# Supplementary material for: Global decline in net primary production underestimated by climate models
Source: PubMed Central journal article supplement (PMC11785529; doi:10.1038/s43247-025-02051-4), 2025-02-01
Supplement: 43247_2025_2051_MOESM2_ESM.pdf [file 43247_2025_2051_MOESM2_ESM.pdf]

1 **Global decline in net primary production underestimated by climate models**

2

3 Thomas J. Ryan-Keogh<sup>1\*</sup>, Alessandro Tagliabue<sup>2</sup>, Sandy J. Thomalla<sup>1,3</sup>

4

5 <sup>1</sup>Southern Ocean Carbon-Climate Observatory, CSIR, Cape Town, South Africa

6 <sup>2</sup>Department of Earth, Ocean and Ecological Sciences, School of Environmental Sciences,

7 University of Liverpool, Liverpool, U.K.

8 <sup>3</sup>Marine and Antarctic Research Centre for Innovation and Sustainability, Department of

9 Oceanography, University of Cape Town, Cape Town, South Africa

10

11 Author for materials and correspondence: \*tryankeogh@csir.co.za

12 **Supplementary Information**

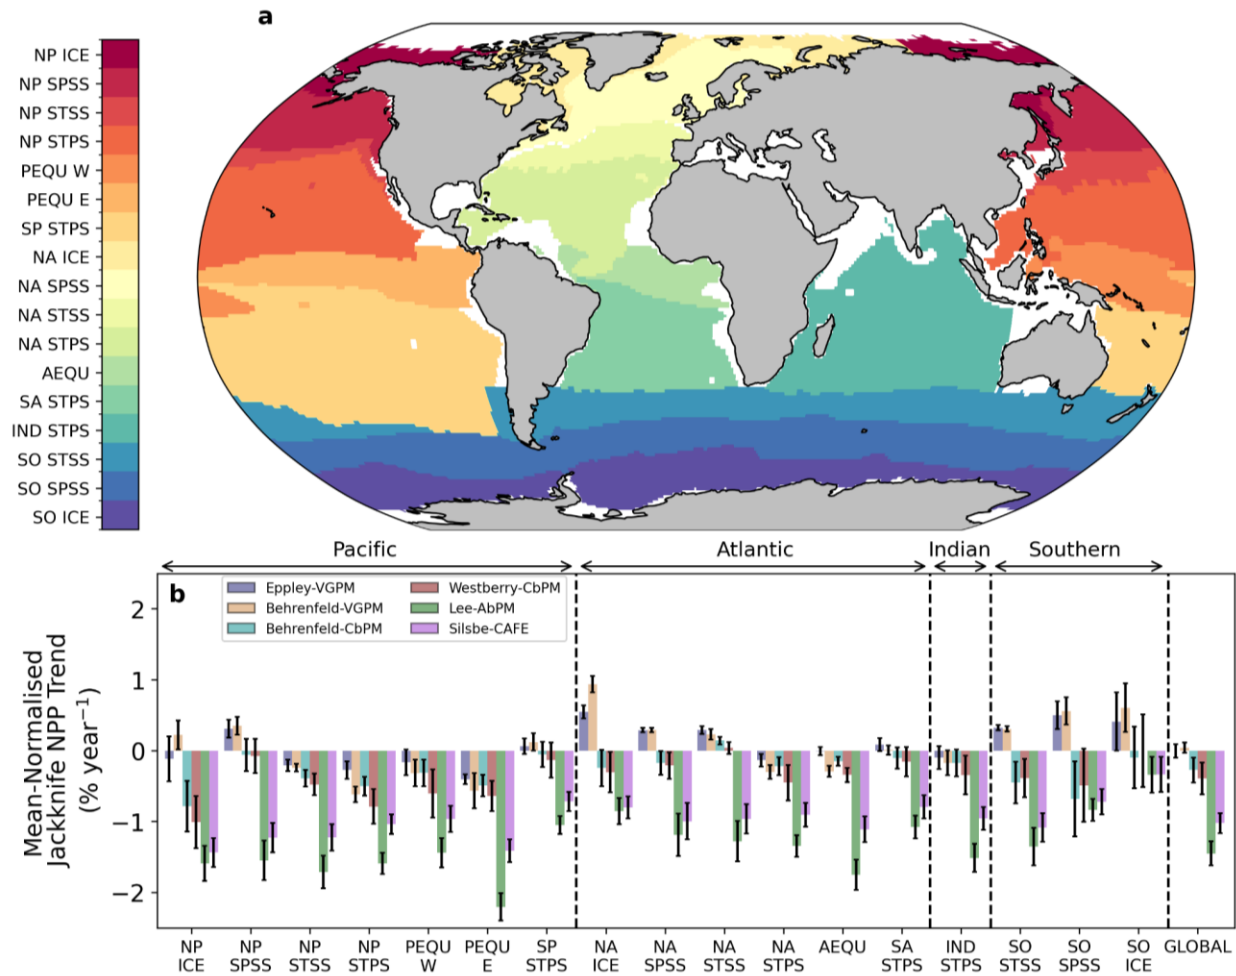

13  
 14 Figure S1: Comparing trends of net primary production from different remote sensing algorithms  
 15 across biomes. (a) map of ocean biomes defined by Fay & McKinley<sup>22</sup> as the North Pacific (NP),  
 16 Equatorial Pacific (PEQU), South Pacific (SP), North Atlantic (NA), Equatorial Atlantic (AEQU),  
 17 South Atlantic (SA), Indian (IND) and Southern Ocean (SO) including the ice (ICE), subpolar  
 18 seasonally stratified (SPSS), subtropical seasonally stratified (STSS) and subtropical permanently  
 19 stratified (STPS) regions. White pixels are regions which could not be classified into a biome. (b)  
 20 Bar plot of jackknife resampled area-weighted mean-normalised annual mean trends in net primary  
 21 production (NPP; % year<sup>-1</sup>) calculated using ordinary least squares per ocean biome for the Eppley-  
 22 VGPM, Behrenfeld-VGPM, Behrenfeld-CbPM, Westberry-CbPM, Lee-AbPM and Silsbe-CAFE  
 23 algorithms. Error bars represent the  $\pm$ standard deviation of the jackknife resampled trends.

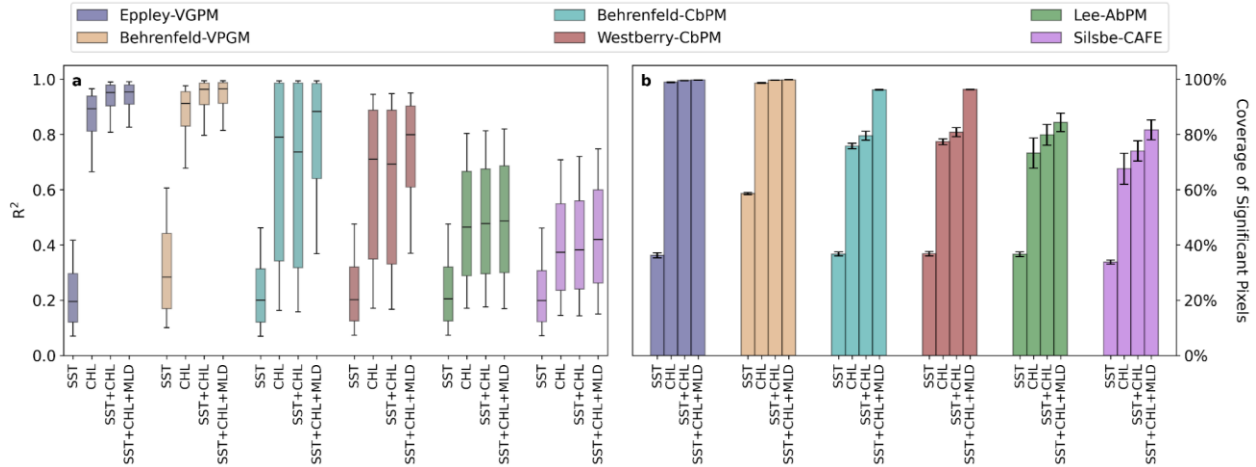

24

25 Figure S2: Sensitivity analysis of choice of metrics used in the multiple linear regression analyses.

26 (a) Boxplots of  $R^2$  values from multiple linear regression analyses using sea surface temperature

27 (SST), chlorophyll-a concentrations (CHL), SST & CHL and mixed layer depth (MLD). (b) Bar

28 chart of Jackknife mean  $\pm$  standard deviation % significant pixels ( $p < 0.05$ ) against choice of

29 metrics. Multiple linear regression analyses performed using Jackknife resampling analysis on the

30 Eppley-VGPM, Behrenfeld-VGPM, Behrenfeld-CbPM, Westberry-CbPM, Lee-AbPM and

31 Silsbe-CAFE remote sensing NPP algorithms.

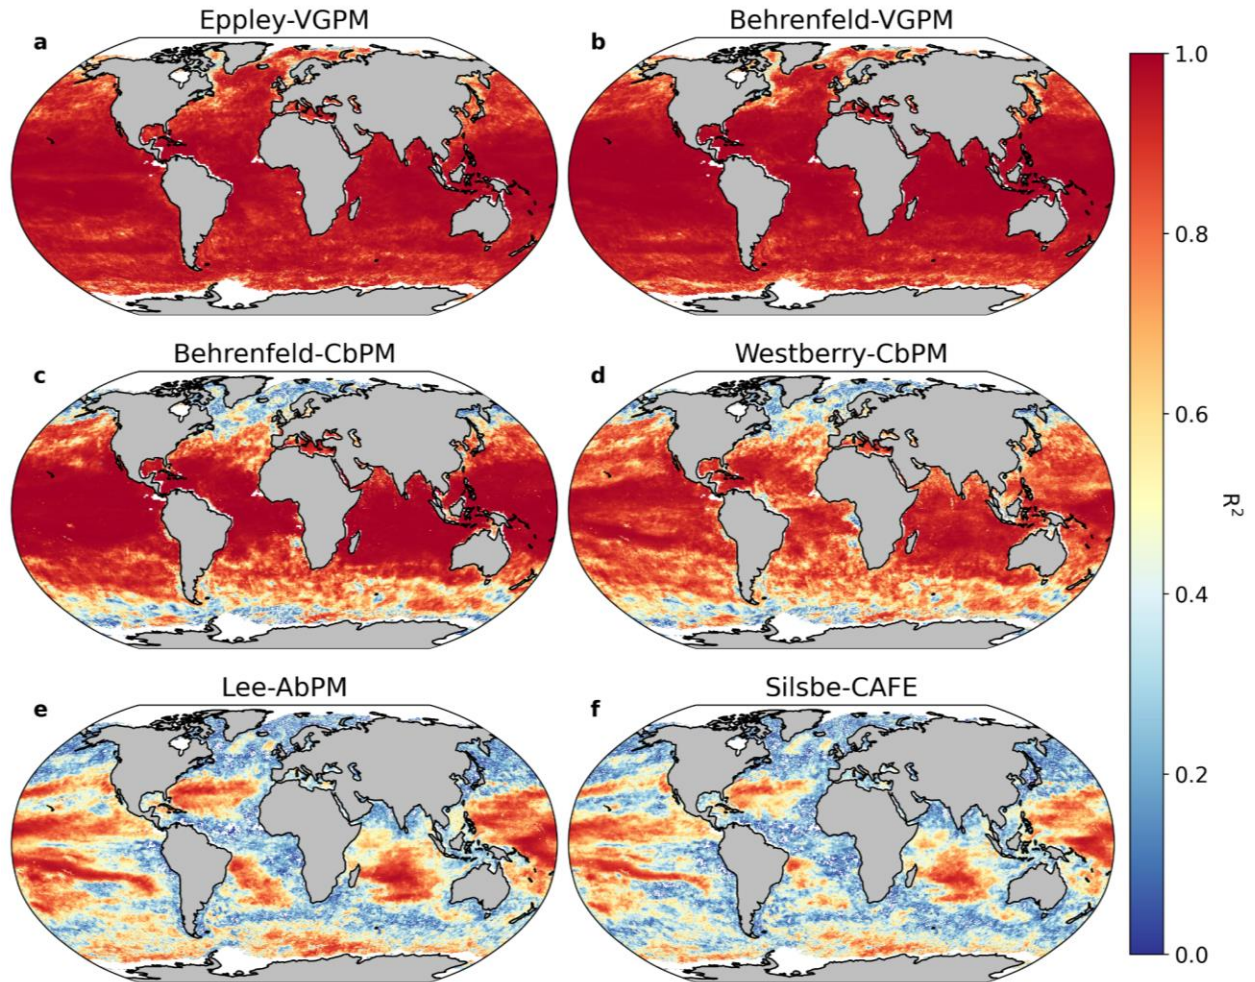

32  
 33 Figure S3: Spatial variability of multiple linear regression analyses performed on remote sensing  
 34 models. Global maps of multiple linear regression adjusted  $R^2$  values from the (a) Eppley-VGPM,  
 35 (b) Behrenfeld-VGPM, (c) Behrenfeld-CbPM, (d) Westberry-CbPM, (e) Lee-AbPM and (f)  
 36 Silsbe-CAFE NPP algorithms. Only pixels where the multiple linear regression model was  
 37 significant ( $p < 0.05$ ) have been plotted in the maps, non-significant pixels ( $p > 0.05$ ) or pixels where  
 38 a driver metric is missing from the time series are presented as white in the maps.

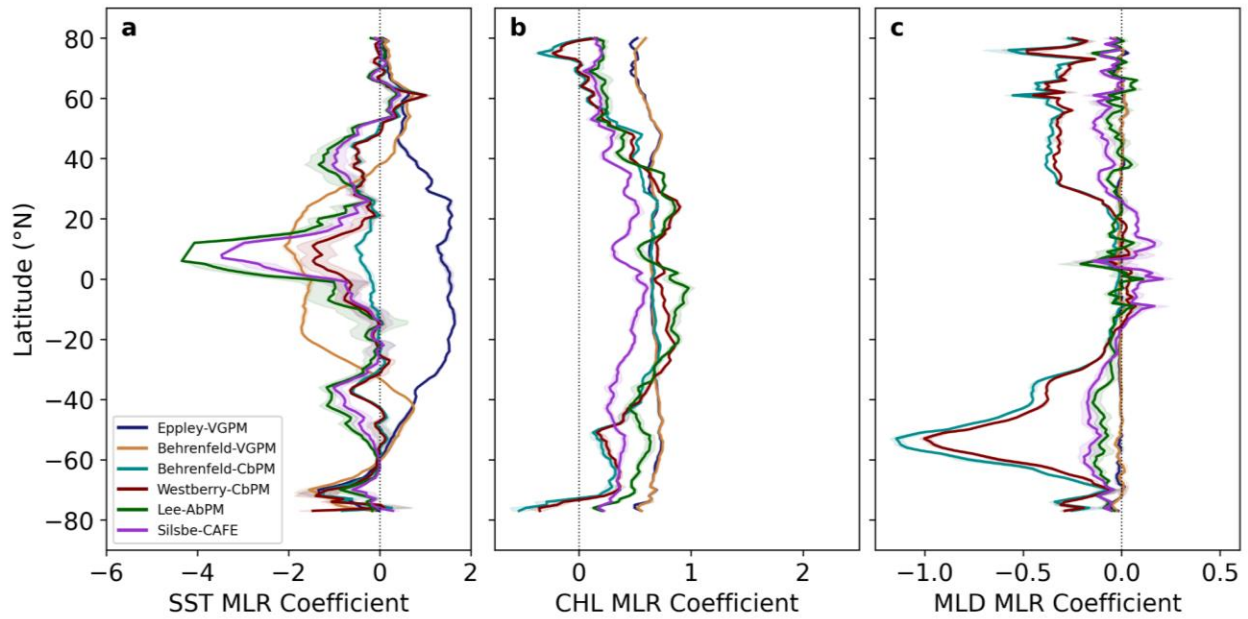

39  
 40 Figure S4: Comparing the Jackknife simulation variability of the multiple linear regression  
 41 coefficients of the remote sensing algorithms. Jackknife simulation averages  $\pm$  standard deviations  
 42 of the multiple linear regression coefficients for (a) sea surface temperature (SST), (b) chlorophyll-  
 43 a concentrations (CHL), and (c) mixed layer depth (MLD) for the Eppley-VGPM, Behrenfeld-  
 44 VGPM, Behrenfeld-CbPM, Westberry-CbPM, Lee-AbPM and Silsbe-CAFE NPP algorithms.

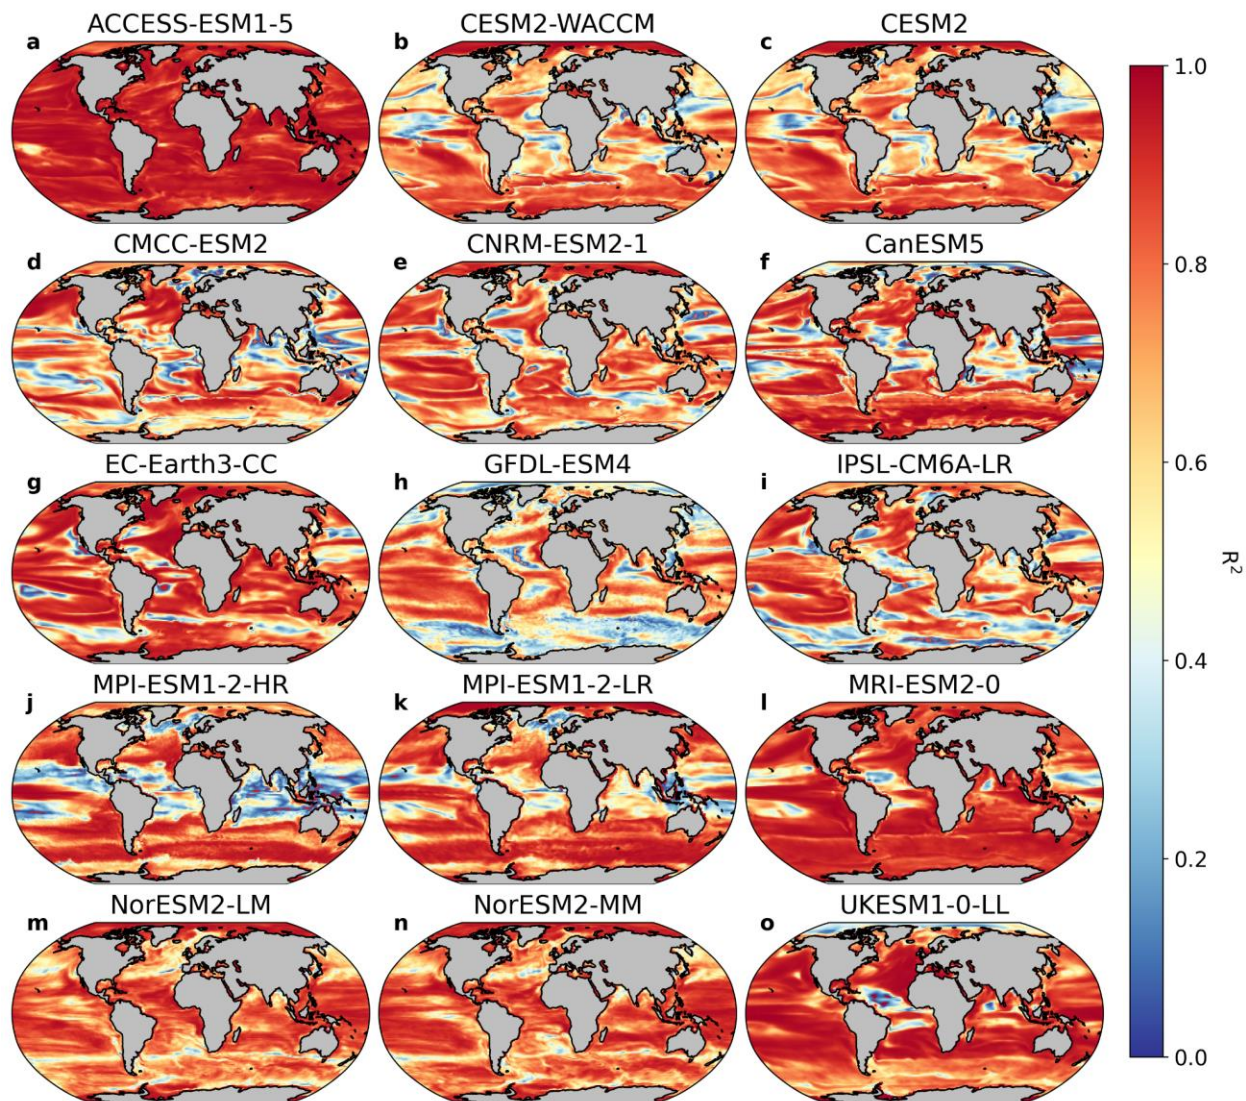

45  
 46 Figure S5: Spatial variability of multiple linear regression analyses performed on the CMIP6 Earth  
 47 system models. Global maps of adjusted  $R^2$  values from the (a) ACCESS-ECM1-5, (b) CESM2-  
 48 WACCM, (c) CESM2, (d) CMMC-ESM2, (e) CNRM-ESM2-1, (f) CanESM5, (g) EC-Earth3-CC,  
 49 (h) GFDL-ESM4, (i) IPSL-CM6A-LR, (j) MPI-ESM1-2-HR, (k) MPI-ESM1-2-LR, (l) MRI-  
 50 ESM2-0, (m) NorESM2-LM, (n) NorESM2-MM and (o) UKESM1-0-LL. Only grid points where  
 51 the multiple linear regression model was significant ( $p < 0.05$ ) have been plotted in the maps, non-  
 52 significant grid points ( $p > 0.05$ ) or grid points where a driver metric is missing from the time series  
 53 are presented as white in the maps.

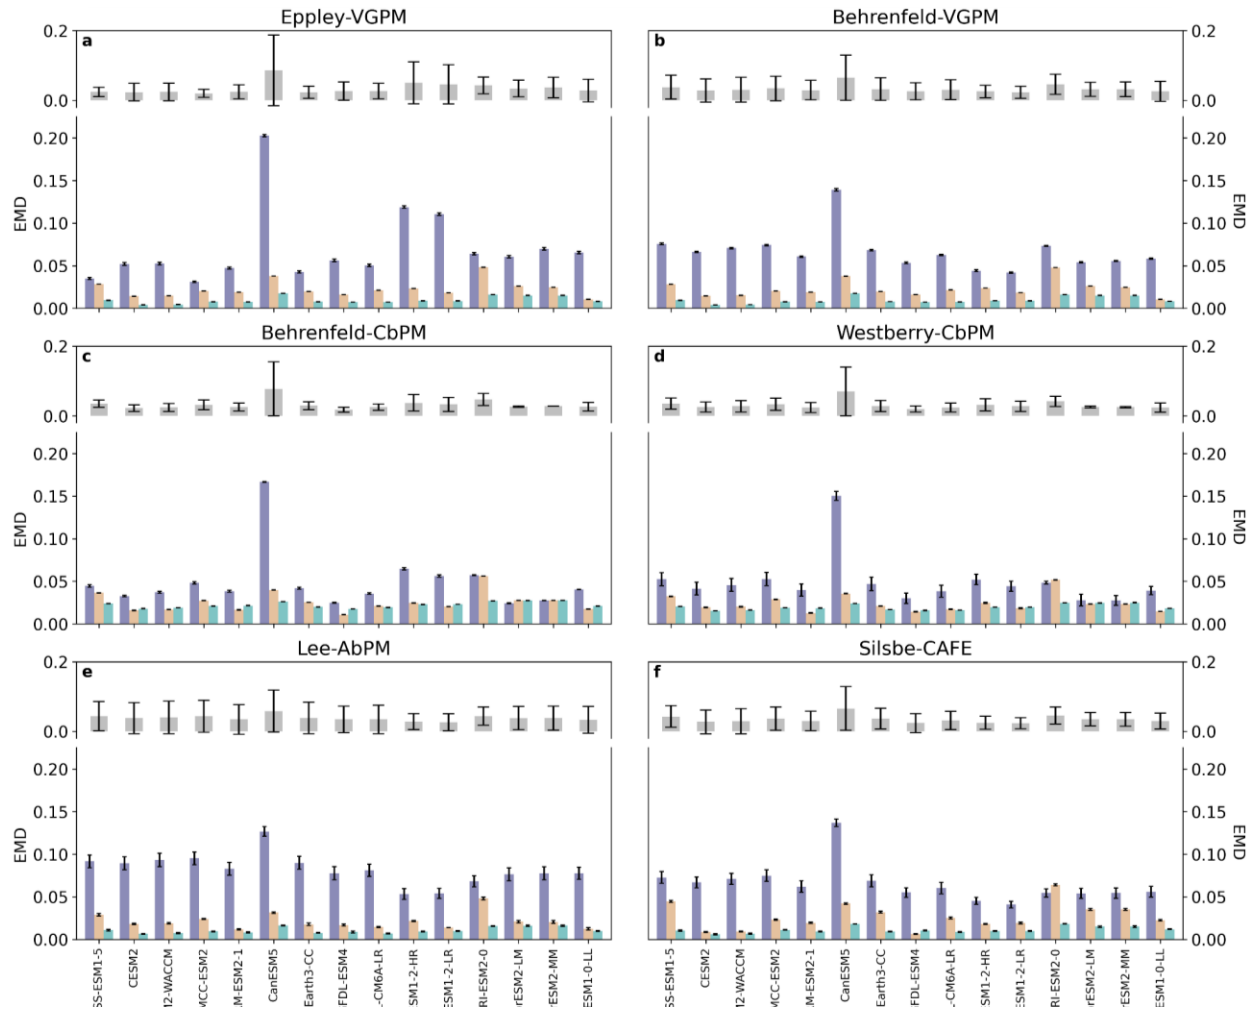

54  
 55 Figure S6: Comparing multiple linear regression coefficients from remote sensing algorithms to  
 56 Earth system models. Bottom bar plots represent globally averaged biome-weighted Earth mover's  
 57 distance (EMD) metric of multiple linear regression coefficients for sea surface temperature (SST),  
 58 chlorophyll-a concentrations (CHL) and mixed layer depth (MLD) per Earth system model for the  
 59 (a) Eppley-VGPM, (b) Behrenfeld-VGPM, (c) Behrenfeld-CbPM, (d) Westberry-CbPM, (e) Lee-  
 60 AbPM and (f) Silsbe-CAFE NPP algorithms across all 7 Jackknife simulations. Top bar plots  
 61 represent the mean $\pm$ standard deviation across the metric drivers for each Earth system model per  
 62 NPP algorithm. EMD metrics were calculated using multiple linear regression coefficients  
 63 restricted using the IQR fence test (see methods) for both remote sensing and CMIP6 models.

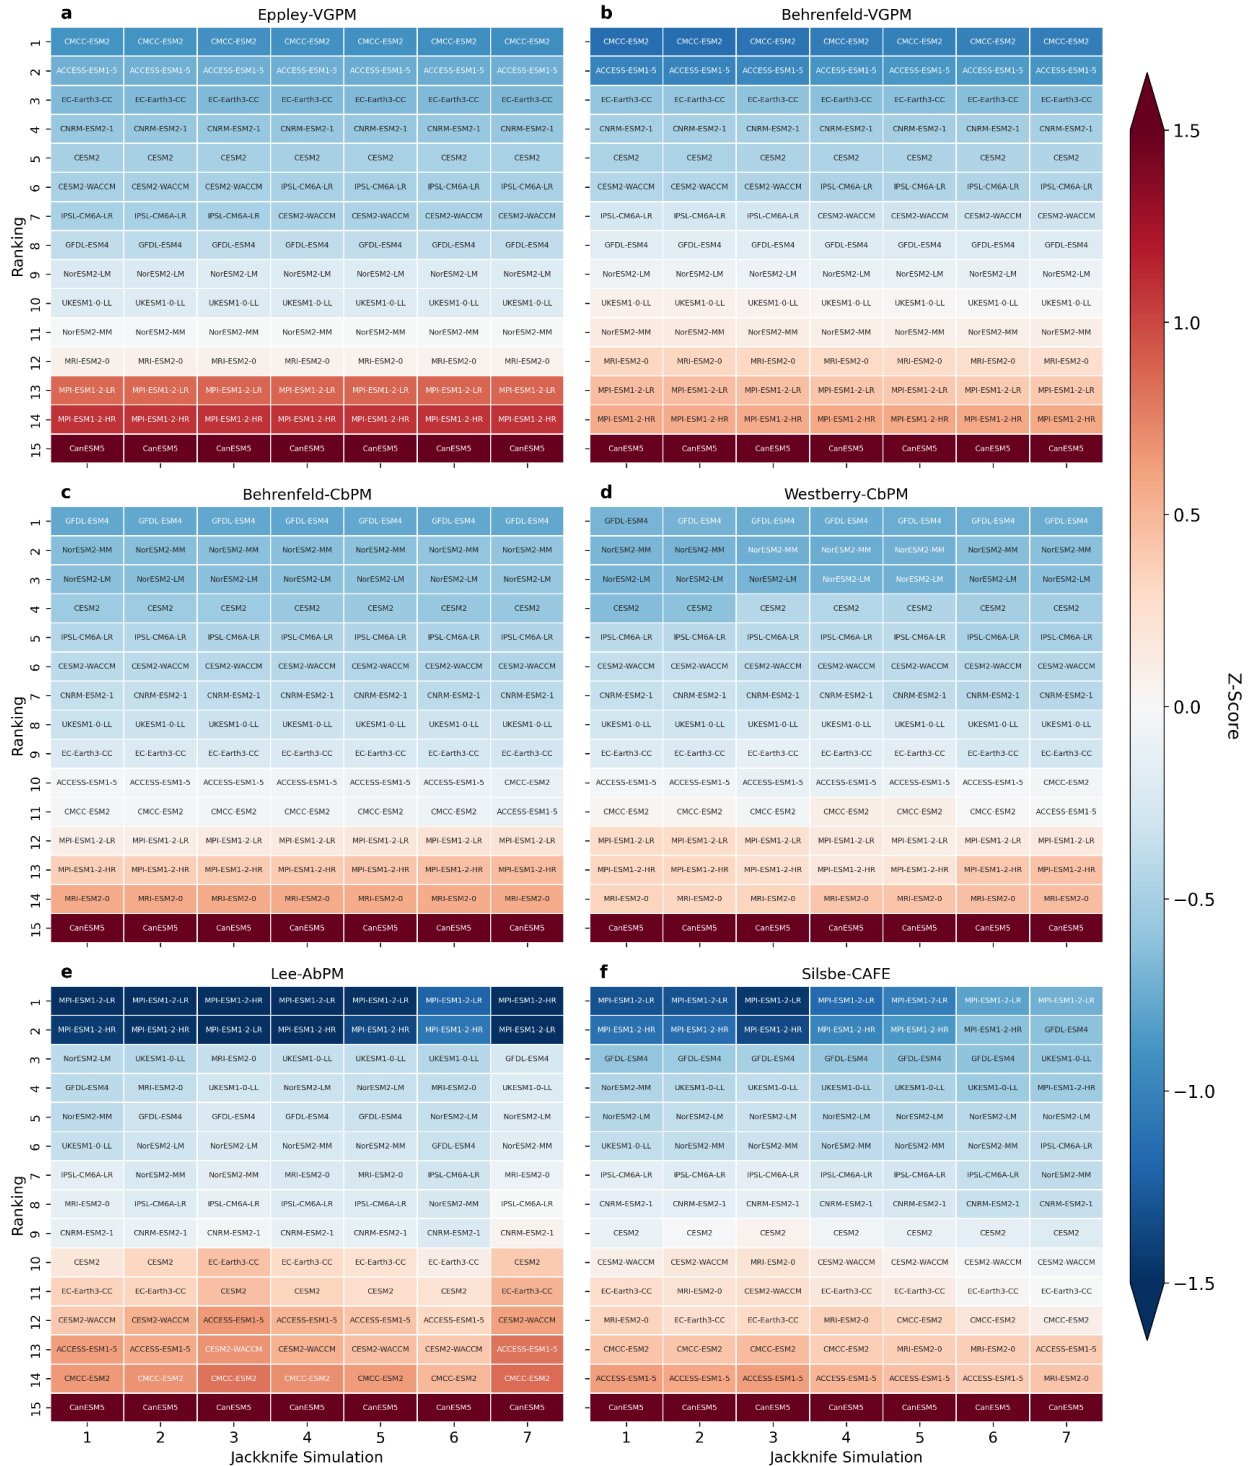

64

65 Figure S7: Ranking Earth system models using Z-score assessments of the Earth mover's distance  
 66 metric for each Jackknife simulation. Heatmaps of Z-scores for ranked Earth system models per  
 67 NPP remote sensing algorithm, including (a) Eppley-VGPM, (b) Behrenfeld-VGPM, (c)  
 68 Behrenfeld-CbPM, (d) Westberry-CbPM, (e) Lee-AbPM and (f) Silsbe-CAFE.



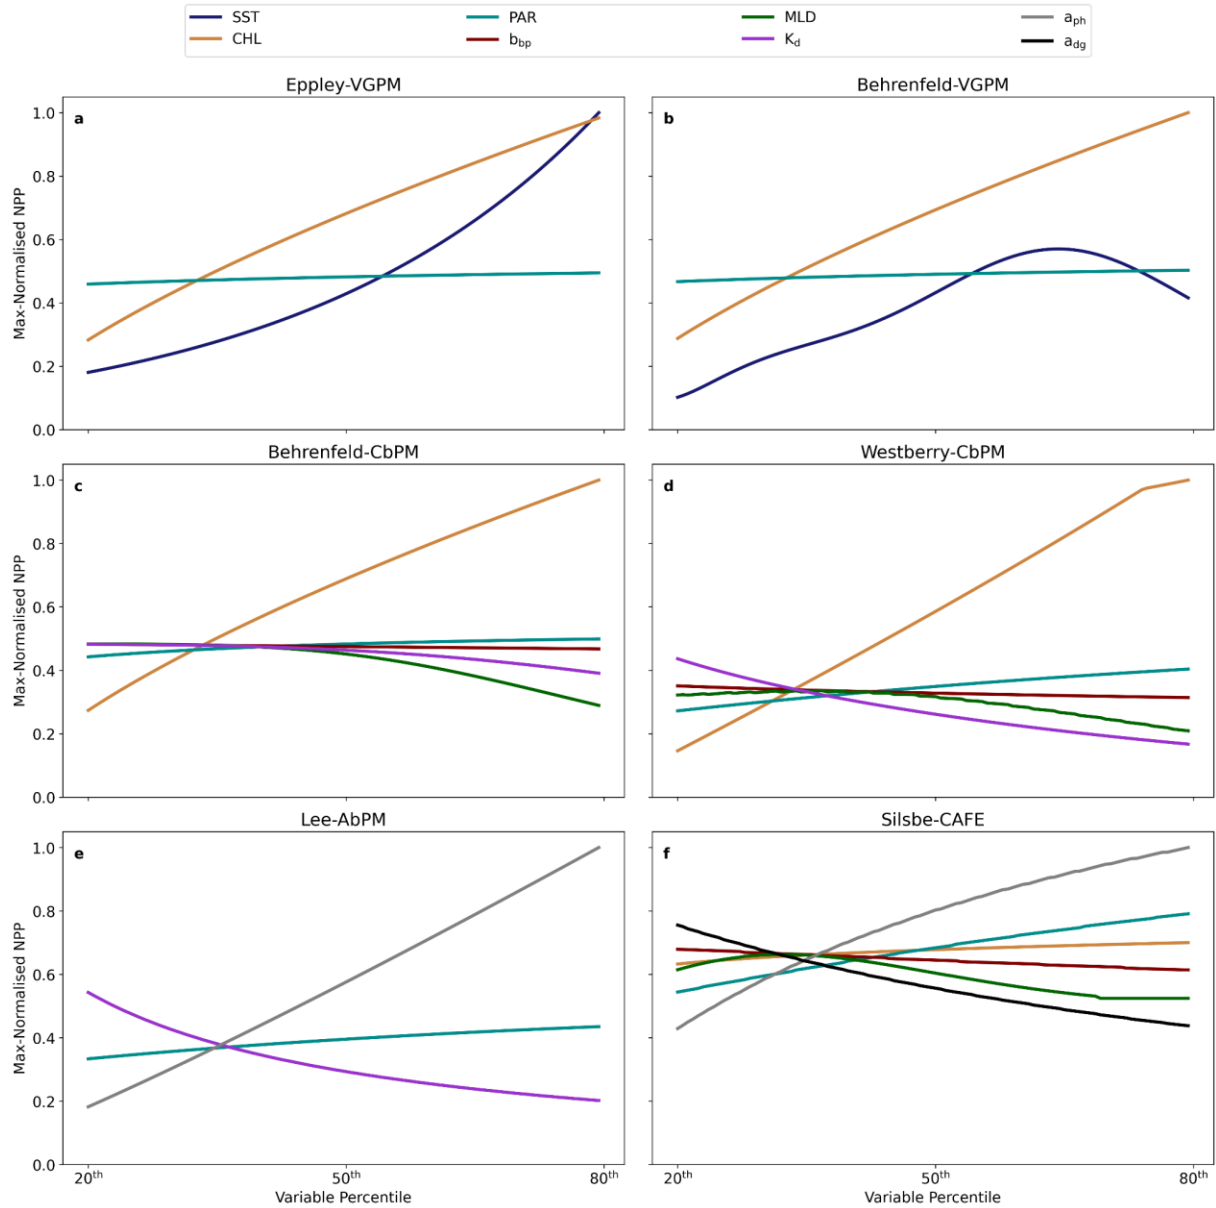

69

70 Figure S8: Exploring the input variable dependency in estimating net primary production. Line  
 71 plots of max-normalised net primary production (NPP) calculated using the (a) Eppley-VGPM,  
 72 (b) Behrenfeld-VGPM, (c) Behrenfeld-CbPM, (d) Westberry-CbPM, (e) Lee-AbPM and (f)  
 73 Silsbe-CAFE NPP algorithms. Input variables include sea surface temperature (SST), chlorophyll-  
 74 a (CHL), photosynthetically active radiation (PAR), particulate backscattering ( $b_{bp}$ ), mixed layer  
 75 depth (MLD), diffuse attenuation coefficient ( $K_d$ ), phytoplankton absorption ( $a_{ph}$ ) and detrital  
 76 absorption ( $a_{dg}$ ). The input variable being tested was allowed to range between the climatological  
 77 (1998-2023) 20<sup>th</sup> and 80<sup>th</sup> percentile, whilst the other input variables were held constant at the  
 78 climatological median value.

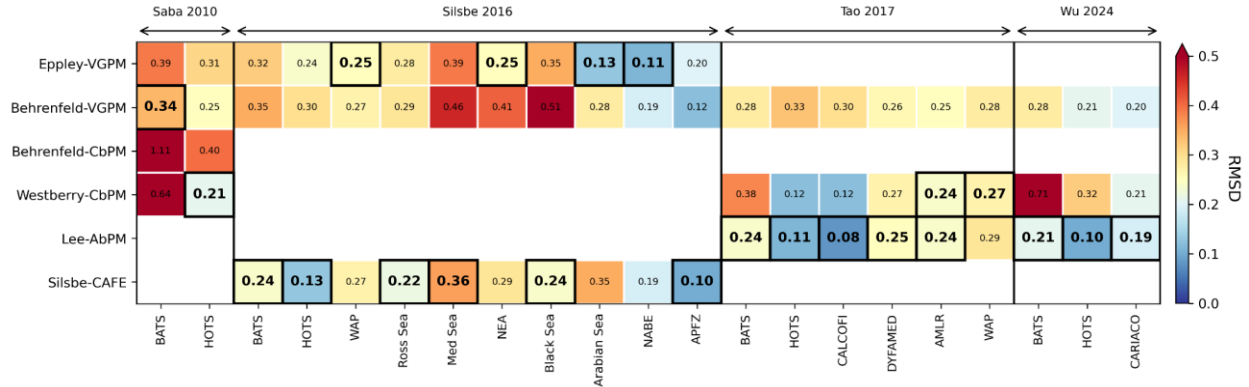

79  
80 Figure S9: Comparing differences between remote sensing NPP algorithms and direct field  
81 measurements. Root mean square differences (RMSD) between NPP estimated from Eppley-  
82 VGPM, Behrenfeld-VGPM, Behrenfeld-CbPM, Westberry-CbPM, Lee-AbPM and Silsbe-CAFE  
83 NPP algorithms and direct field measurements from the Bermuda Atlantic Time Series (BATS),  
84 Hawaii Oceanic Time Series (HOTS), Western Antarctic Peninsula (WAP), coastal north east  
85 Atlantic (NEA), Black Sea, Arabian Sea, pelagic North Atlantic (NABE), Antarctic Polar Frontal  
86 Zone (APFZ), California coast (CALCOFI), Mediterranean Sea (DYFAMED), Scotia Sea  
87 (AMLR), Cariaco basin (CARIACO)<sup>21,32–34</sup>. Cells with bold text and a black border represent the  
88 algorithm which had the lowest RMSD for the specific study. Please note that empty cells means  
89 that the algorithm was not implemented during the study.

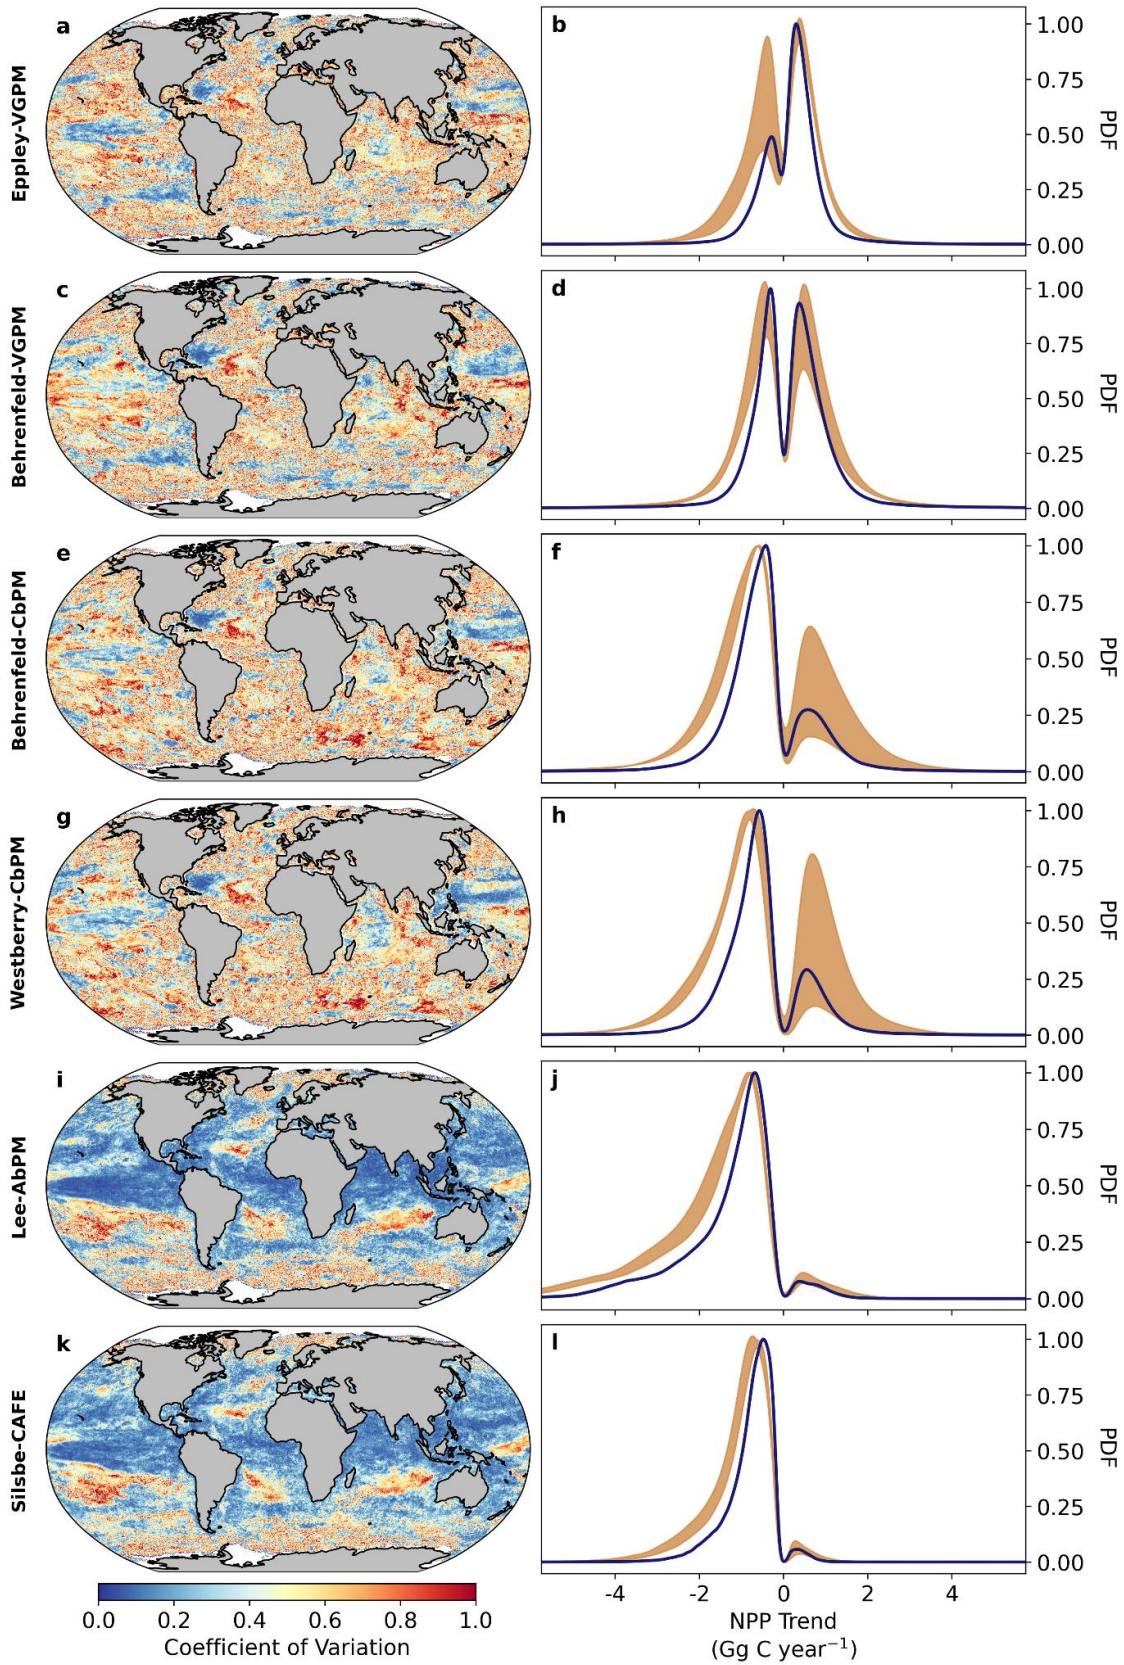

91 Figure S10: Exploring the sensitivity of trends in annual mean net primary production. Maps of  
92 coefficient of variation (a,c,e,f,g,l,k) and normalised probability density function (PDF) plots  
93 (b,d,f,h,j,l) of trends in annual mean net primary production (NPP;  $\text{Gg year}^{-1}$ ) from 1998-2023  
94 (Original) and the results from a Monte Carlo Jackknife experiment in which 20 years of the 1998-  
95 2023 period are sub-sampled for trend calculations (Jackknife Simulations) for the (a,b) Eppley-  
96 VGPM, (c,d) Behrenfeld-VGPM, (e,f) Behrenfeld-CbPM, (g,h) Westberry-CbPM, (i,j) Lee-AbPM  
97 and (k,l) Silsbe-CAFE NPP algorithms. Coefficient of variation calculated as the Jackknife trend  
98  $1\sigma$  over the absolute mean Jackknife trends. Shaded regions in the PDF plots represent the  
99 Jackknife Simulation mean  $\pm$  standard deviation. Only pixels where the trend is significant ( $p < 0.05$ )  
100 are included in the PDF distributions.

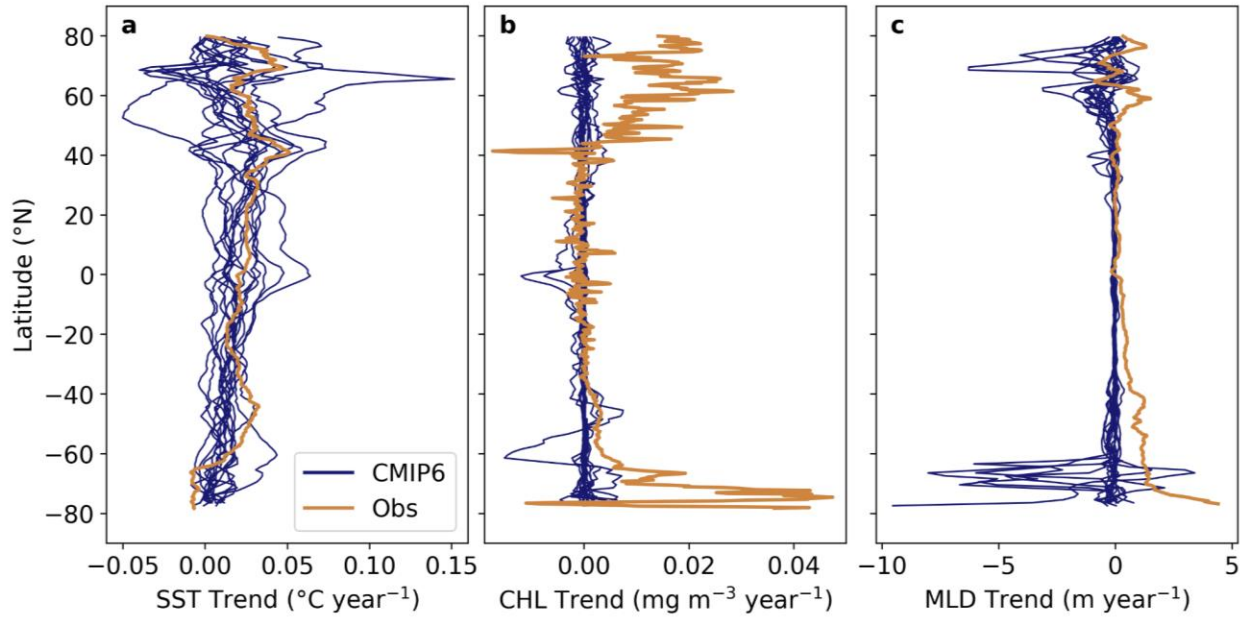

101  
 102 Figure S11: Spatial variability of the driver annual trends. Zonal averages  $\pm$  standard deviations of  
 103 the annual trends for (a) sea surface temperature (SST), (b) chlorophyll-a concentrations (CHL)  
 104 and (c) mixed layer depth (MLD) for the ensemble of CMIP6 Earth system models and  
 105 observations.
